# Supplementary material
Source: HighWire-hosted journal article supplement (https://jnm.snmjournals.org/highwire/filestream/97859/field_highwire_adjunct_files/0/242750_Supplemental_Data.pdf)
Supplement: 242750_Supplemental_Data.pdf [file 242750_Supplemental_Data.pdf]

| Group                 | Age (months) | Amyloid-PET |                                                |                       |                           |                        |                                              |                       |                           |                        | TSPO-PET |
|-----------------------|--------------|-------------|------------------------------------------------|-----------------------|---------------------------|------------------------|----------------------------------------------|-----------------------|---------------------------|------------------------|----------|
|                       |              | n           | Moderate asymmetry (>/< 95%-CI <sub>WT</sub> ) |                       |                           |                        | Strong asymmetry (>/< 99%-CI <sub>WT</sub> ) |                       |                           |                        | n        |
|                       |              |             | Left (n, % per subgroup)                       | Left (n, % per model) | Right (n, % per subgroup) | Right (n, % per model) | Left (n, % per subgroup)                     | Left (n, % per model) | Right (n, % per subgroup) | Right (n, % per model) |          |
| APP/PS1               | 3            | 6           | 0 ( 0%)                                        | 20%                   | 0 ( 0%)                   | 22%                    | 0 ( 0%)                                      | 15%                   | 0 ( 0%)                   | 22%                    | 0        |
|                       | 6            | 14          | 3 (21%)                                        |                       | 3 (21%)                   |                        | 2 (14%)                                      |                       | 3 (21%)                   |                        | 14       |
|                       | 9            | 6           | 1 (16%)                                        |                       | 1 (17%)                   |                        | 1 (17%)                                      |                       | 1 (17%)                   |                        | 5        |
|                       | 12           | 15          | 4 (27%)                                        |                       | 5 (33%)                   |                        | 3 (20%)                                      |                       | 5 (33%)                   |                        | 8        |
| PS2APP                | 6 - 8        | 55          | 15 (27%)                                       | 30%                   | 12 (22%)                  | 19%                    | 10 (18%)                                     | 21%                   | 9 (16%)                   | 16%                    | 13       |
|                       | 9 - 10       | 42          | 16 (38%)                                       |                       | 9 (21%)                   |                        | 14 (33%)                                     |                       | 9 (21%)                   |                        | 10       |
|                       | 11 - 14      | 36          | 12 (33%)                                       |                       | 5 (14%)                   |                        | 7 (19%)                                      |                       | 4 (11%)                   |                        | 0        |
|                       | 15 - 17      | 14          | 1 ( 7%)                                        |                       | 2 (20%)                   |                        | 0 ( 0%)                                      |                       | 2 (14%)                   |                        | 0        |
| APP-SL70              | 4 - 6        | 130         | 21 (16%)                                       | 18%                   | 20 (15%)                  | 16%                    | 12 ( 9%)                                     | 12%                   | 16 (12%)                  | 13%                    | 0        |
|                       | 7 - 9        | 37          | 6 (16%)                                        |                       | 6 (16%)                   |                        | 5 (14%)                                      |                       | 5 (14%)                   |                        | 8        |
|                       | 10 - 12      | 31          | 8 (26%)                                        |                       | 7 (23%)                   |                        | 6 (19%)                                      |                       | 5 (16%)                   |                        | 10       |
|                       | 13 - 15      | 10          | 3 (30%)                                        |                       | 1 (10%)                   |                        | 2 (20%)                                      |                       | 1 (10%)                   |                        | 8        |
| App <sup>NL-G-F</sup> | 2.5          | 20          | 4 (20%)                                        | 29%                   | 5 (25%)                   | 20%                    | 3 (15%)                                      | 10%                   | 4 (20%)                   | 18%                    | 17       |
|                       | 5            | 17          | 4 (24%)                                        |                       | 3 (18%)                   |                        | 1 ( 6%)                                      |                       | 3 (18%)                   |                        | 15       |
|                       | 7.5          | 9           | 4 (44%)                                        |                       | 2 (22%)                   |                        | 2 (22%)                                      |                       | 2 (22%)                   |                        | 11       |
|                       | 10           | 9           | 4 (44%)                                        |                       | 1 (11%)                   |                        | 2 (22%)                                      |                       | 1 (11%)                   |                        | 12       |
| APP <sup>swe</sup>    | 9 - 12       | 26          | 3 (12%)                                        | 6%                    | 2 ( 8%)                   | 26%                    | 1 ( 4%)                                      | 2%                    | 2 ( 8%)                   | 22%                    | 0        |
|                       | 13 - 16      | 30          | 1 ( 3%)                                        |                       | 11 (37%)                  |                        | 0 ( 3%)                                      |                       | 10 (33%)                  |                        | 0        |
|                       | 17 - 20      | 16          | 0 ( 0%)                                        |                       | 6 (38%)                   |                        | 0 ( 0%)                                      |                       | 4 (25%)                   |                        | 0        |
| C57BL/6 (wild-type)   | 2.5 - 16     | 27          |                                                |                       |                           |                        |                                              |                       |                           |                        |          |

**Supplemental Table 1 – Overview of the animal cohorts studied by Aβ-PET and TSPO-PET and their frequency of asymmetry in Aβ-PET**
